# Supplementary material for: Evolution of feeding specialization in Tanganyikan scale-eating cichlids: a molecular phylogenetic approach
Source: PubMed Central journal article supplement (PMC2212659; doi:10.1186/1471-2148-7-195), 2007-10-18
Supplement: 1471-2148-7-195-S1.pdf [file 1471-2148-7-195-S1.pdf]

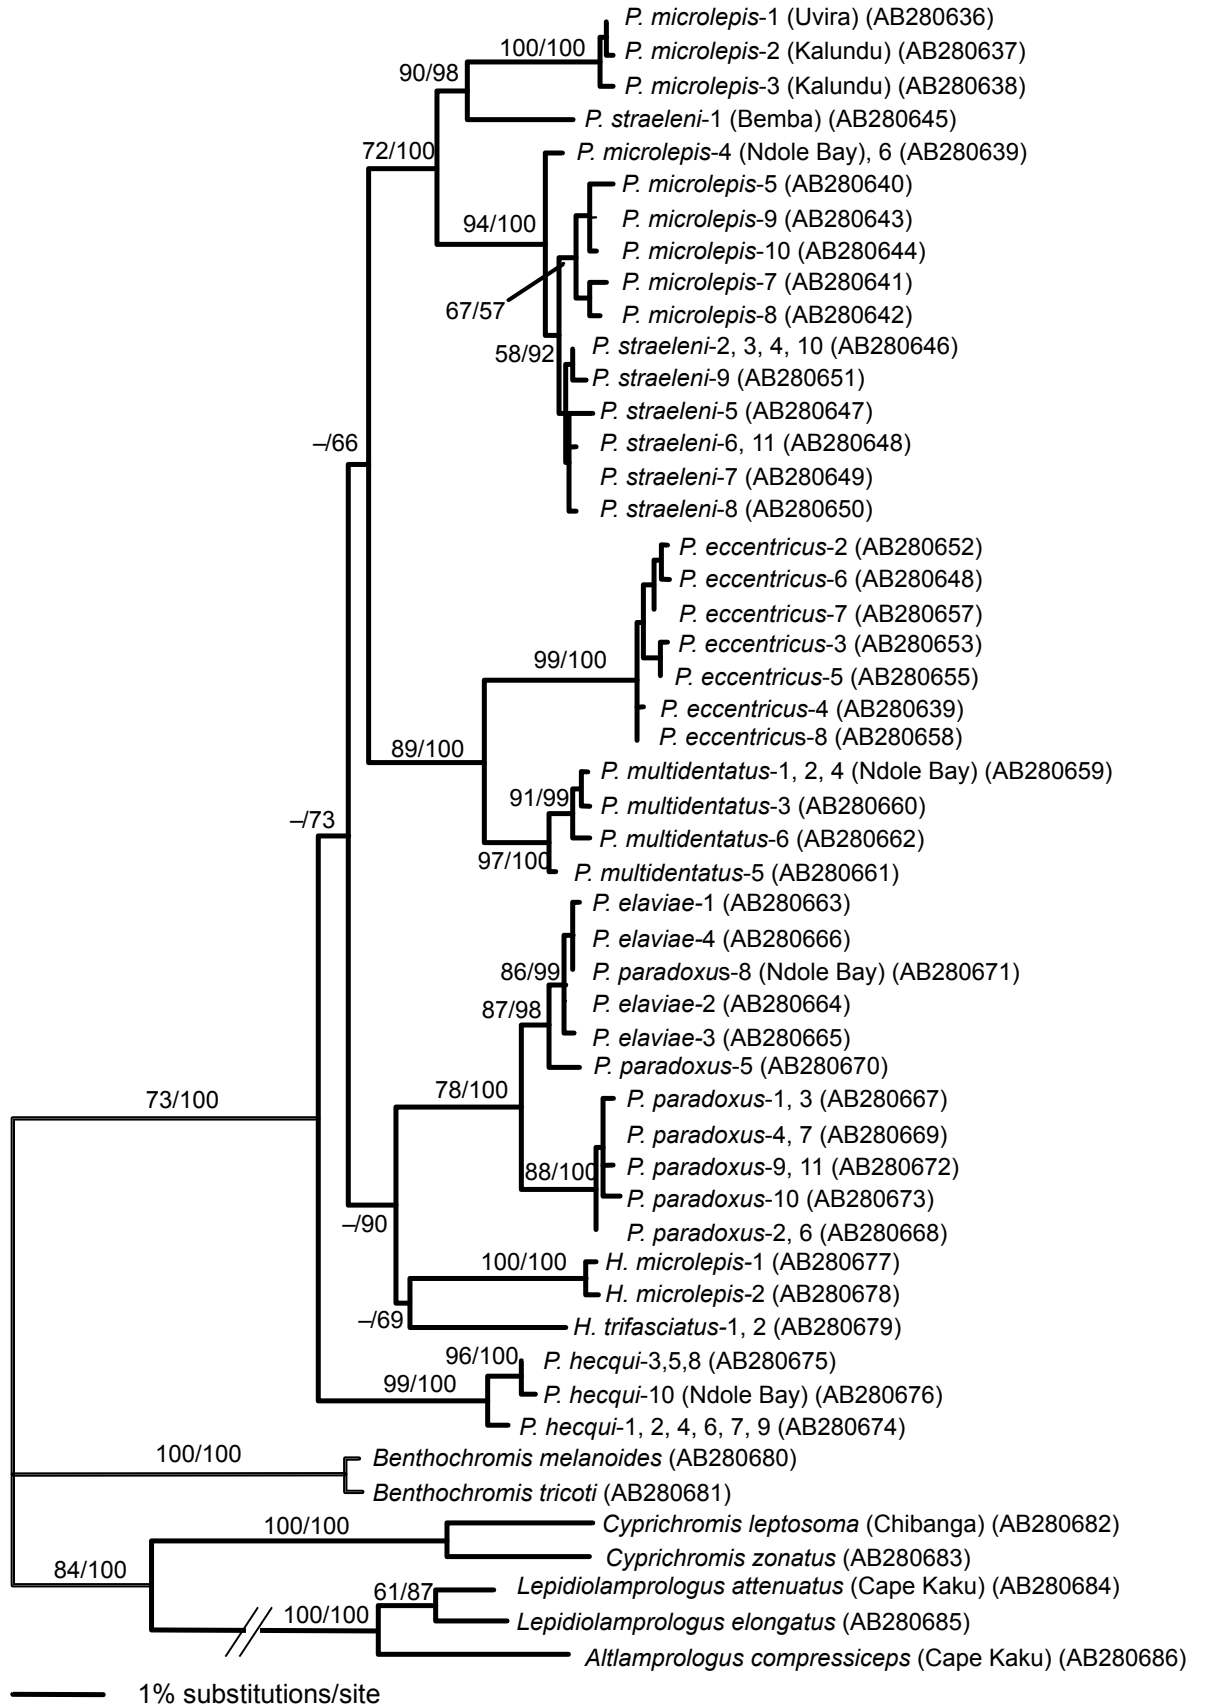

Evolution of feeding specialisation in Tanganyikan scale-eating cichlids: a molecular phylogenetic approach

By R. Takahashi, K. Watanabe, M. Nishida, and M. Hori

Additional file 1—Supplementary figure 1. Maximum likelihood tree based on mitochondrial cytochrome *b* gene sequences.
